# Supplementary material
Source: PubMed Central journal article supplement (PMC4282560)
Supplement: embj0033-2847-sd8.pdf [file embj0033-2847-sd8.pdf]

**Supplementary Table S1** Data collection and refinement statistics (**Molecular replacement**)

---

| tmRad50 <sup>NBD</sup> -Mre11 <sup>HLH</sup>         |                       |
|------------------------------------------------------|-----------------------|
| <b>Data collection</b>                               |                       |
| Space group                                          | P1                    |
| Cell dimensions                                      |                       |
| <i>a</i> , <i>b</i> , <i>c</i> (Å)                   | 50.2, 107.6, 97.1     |
| $\alpha$ , $\beta$ , $\gamma$ (°)                    | 90.6, 98.3, 89.4      |
| Resolution (Å)                                       | 50.2-2.7              |
| <i>R</i> <sub>sym</sub> or <i>R</i> <sub>merge</sub> | 13.5 (68.6)*          |
| <i>I</i> / $\sigma$ <i>I</i>                         | 9.3(1.9)              |
| Completeness (%)                                     | 93.8(80.5)            |
| Redundancy                                           | 3.4(3.1)              |
| <b>Refinement</b>                                    |                       |
| Resolution (Å)                                       | 47.7-2.7              |
| No. reflections                                      | 51439                 |
| <i>R</i> <sub>work</sub> / <i>R</i> <sub>free</sub>  | 21.5/27.0             |
| No. atoms                                            | 14169                 |
| Protein                                              | 12556                 |
| DNA/AMPPNP/Mg <sup>2+</sup>                          | 1218/124/4            |
| Water                                                | 267                   |
| B-factors                                            | <b>43.4 (overall)</b> |
| Protein                                              | 35.1                  |
| DNA/AMPPNP/Mg <sup>2+</sup>                          | 146.1/19.3/14.9       |
| Water                                                | 30.8                  |
| R.m.s deviations                                     |                       |
| Bond lengths (Å)                                     | 0.010                 |
| Bond angles (°)                                      | 1.3                   |

---

\*Highest resolution shells (2.8- 2.7 Å) are shown in parenthesis.

**Ramachandran statistics**

outliers (%): 0.5  
allowed (%): 5.0  
favoured (%): 94.5
