# Supplementary material
Source: PubMed Central journal article supplement (PMC4282560)

**A**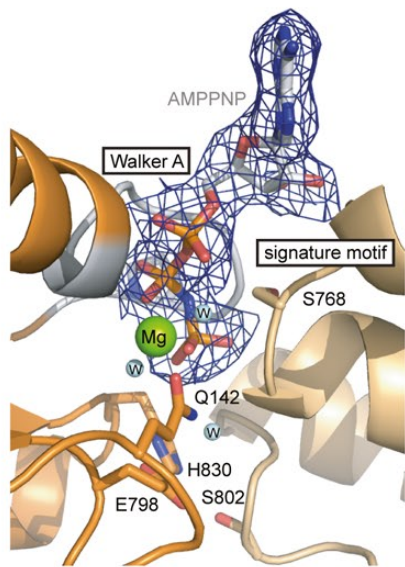**B**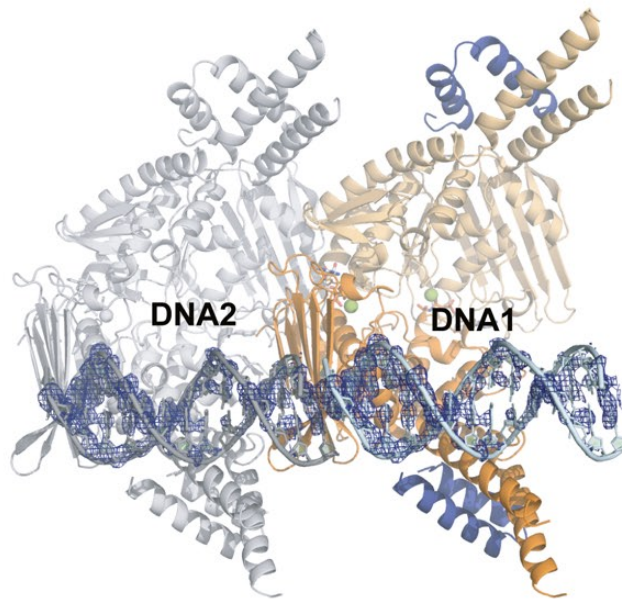**C**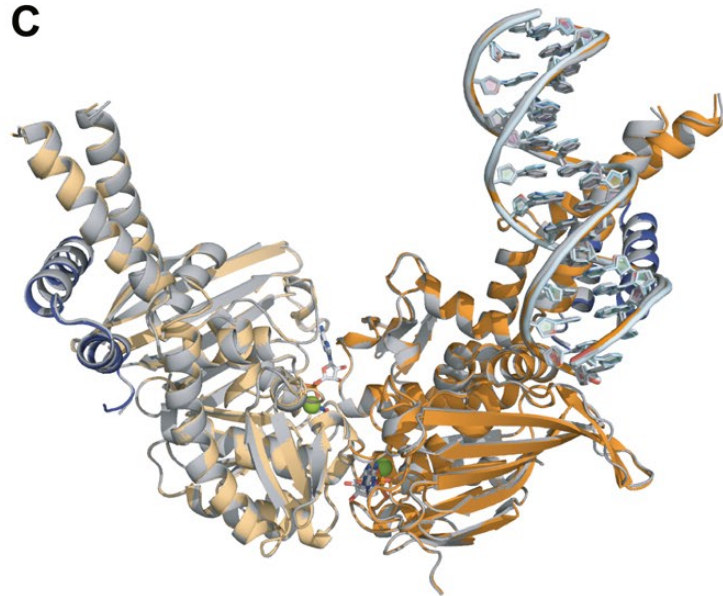

Supplement: embj0033-2847-sd1.pdf [file embj0033-2847-sd1.pdf]

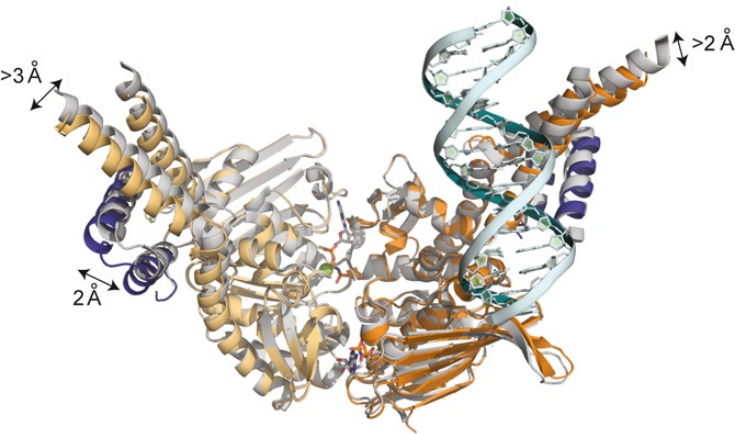

Supplement: embj0033-2847-sd2.pdf [file embj0033-2847-sd2.pdf]

**A**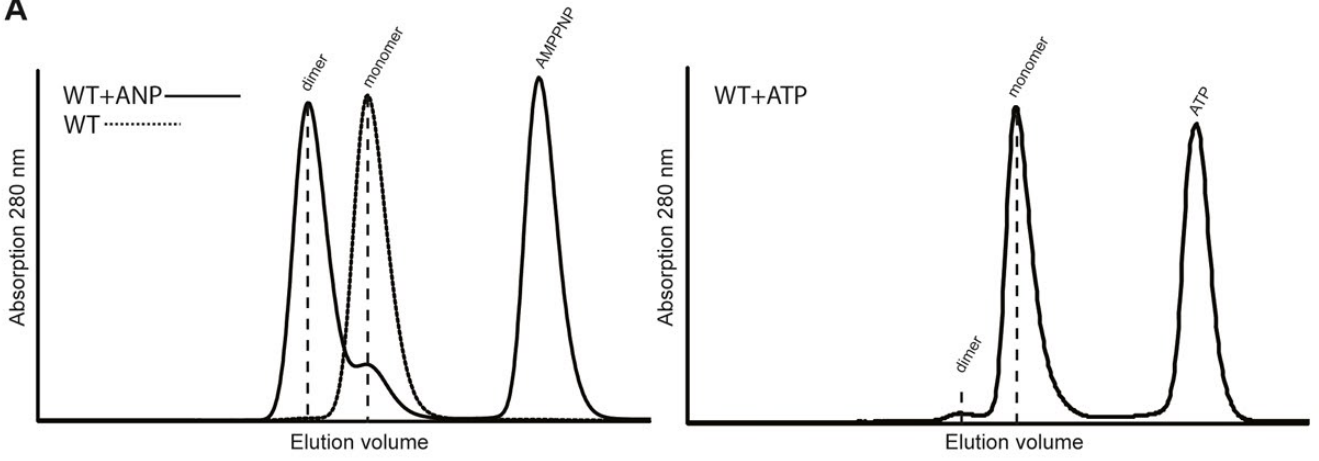**B**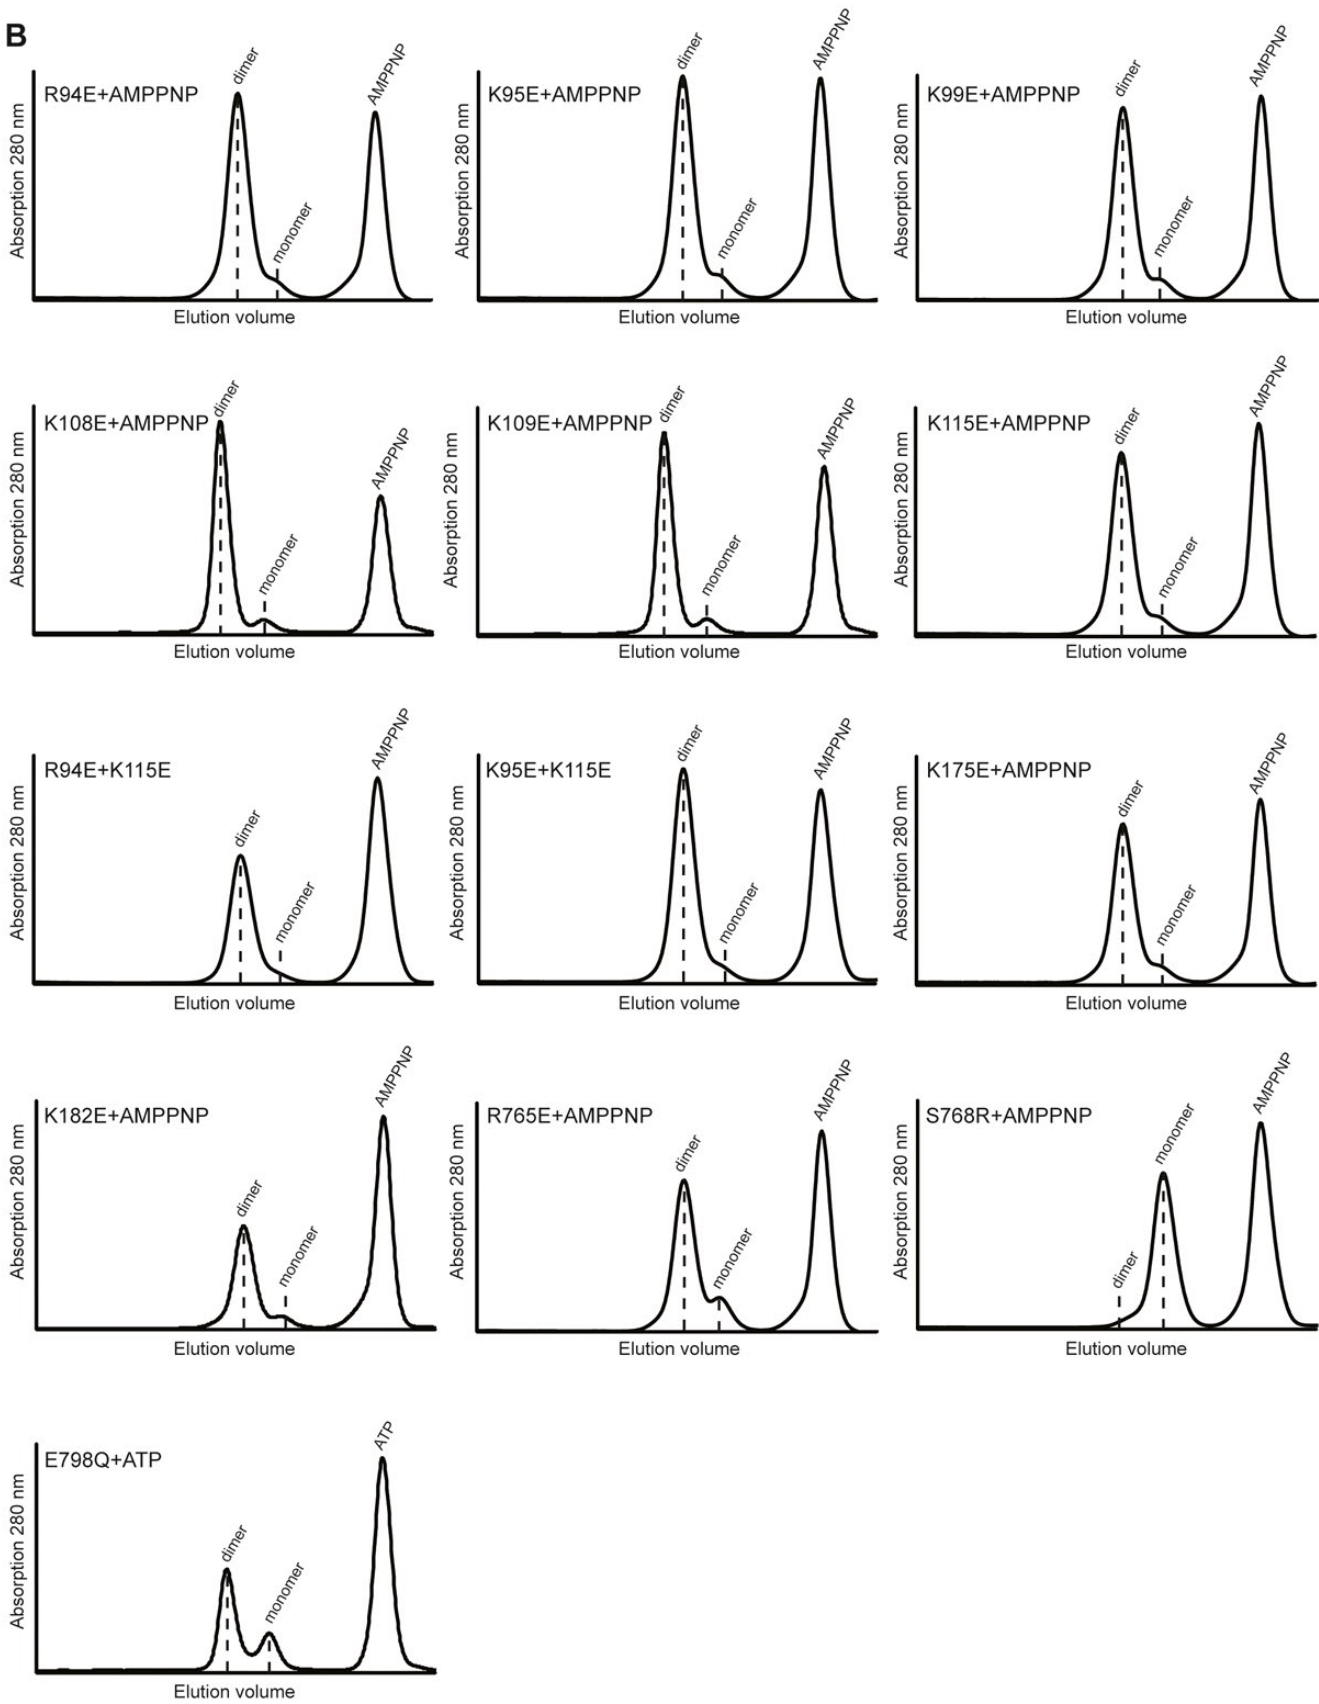

Supplement: embj0033-2847-sd3.pdf [file embj0033-2847-sd3.pdf]

tmRad50<sup>NBD</sup>-Mre11<sup>HLH</sup>tmRad50<sup>NBD</sup>-Mre11<sup>HLH</sup>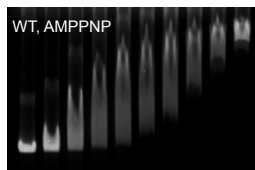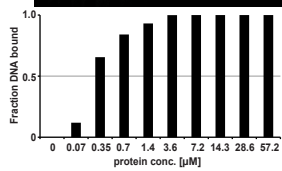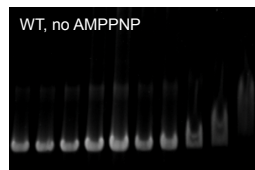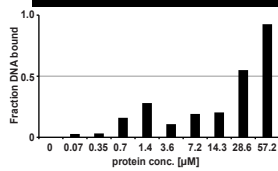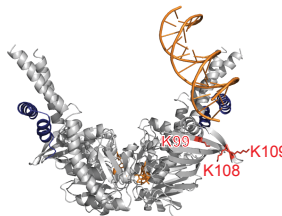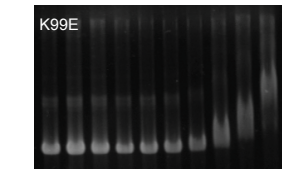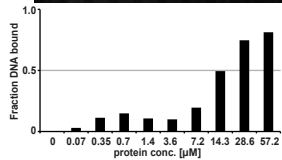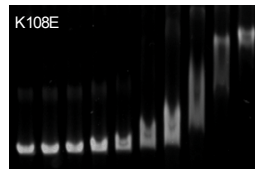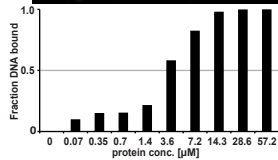tmRad50<sup>NBD</sup>-Mre11<sup>HLH</sup>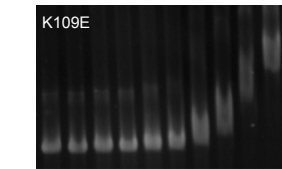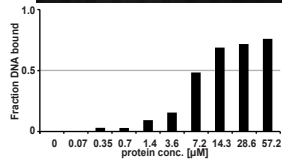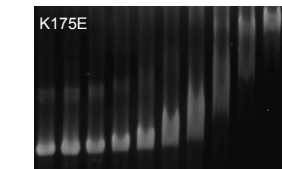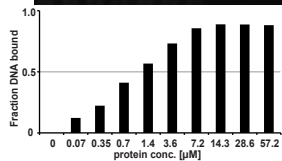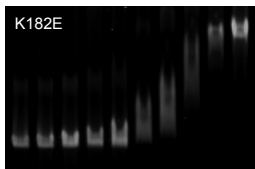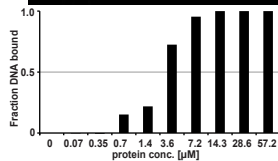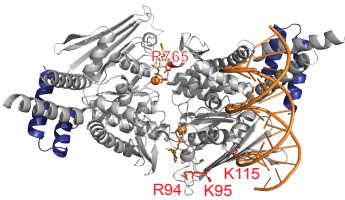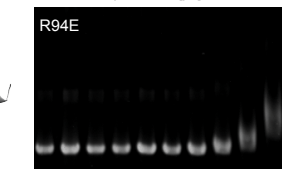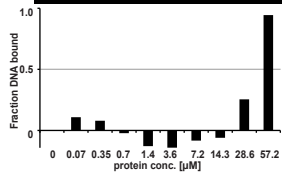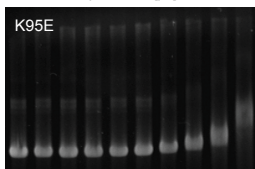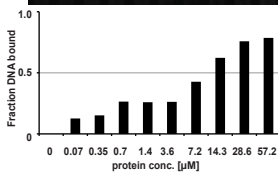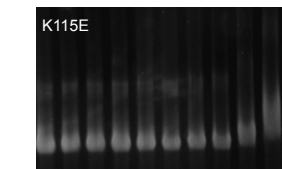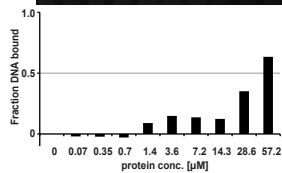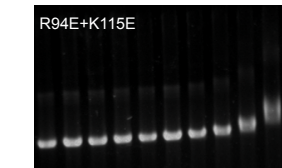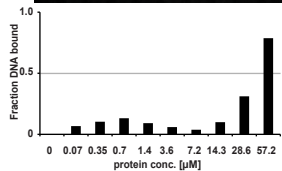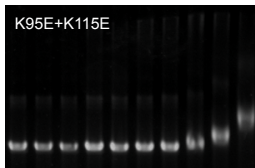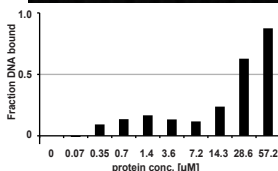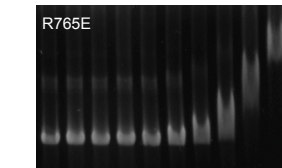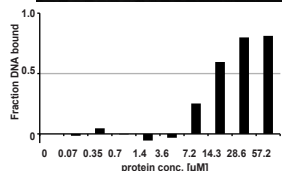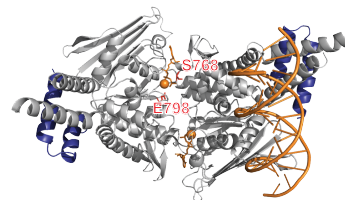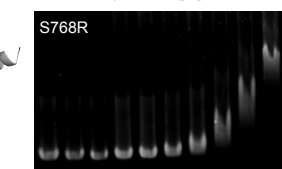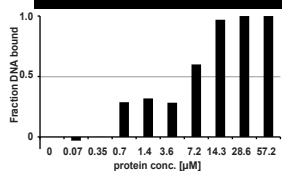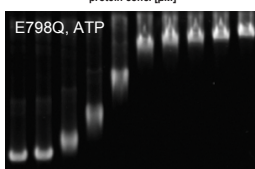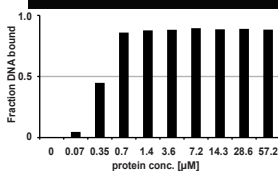

Supplement: embj0033-2847-sd4.pdf [file embj0033-2847-sd4.pdf]

**A**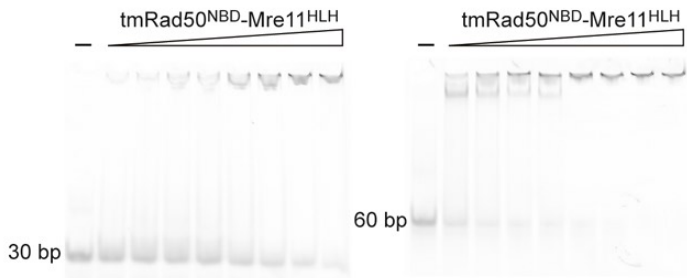**B**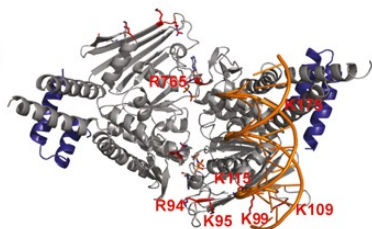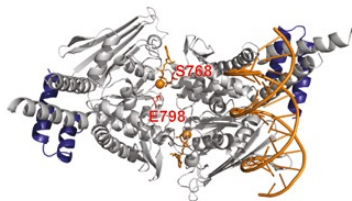

*Thermotoga  
maritima*

*Saccharomyces  
cerevisiae*

R94

K103

K95

K104

K99

K110

K109

R125

K115

R131

K175

N190

R765

R1201

S768

S1205

E798

E1235

Supplement: embj0033-2847-sd5.pdf [file embj0033-2847-sd5.pdf]

**A**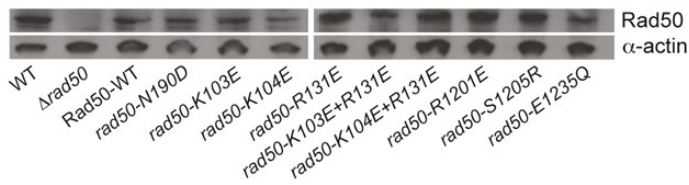**B**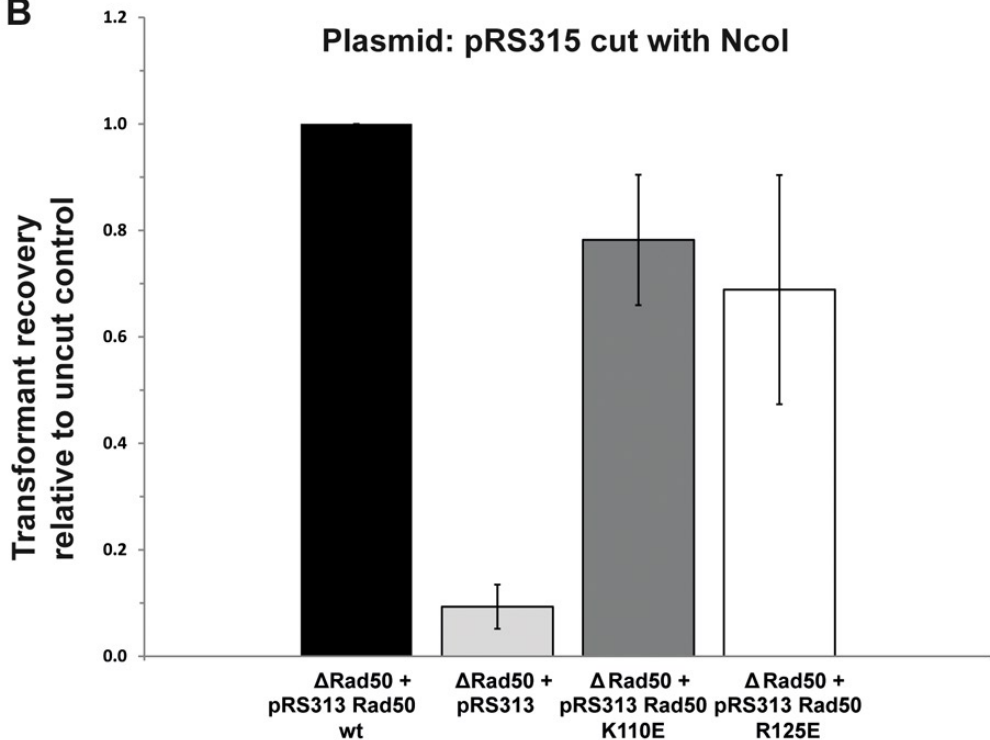

Supplement: embj0033-2847-sd6.pdf [file embj0033-2847-sd6.pdf]

**A**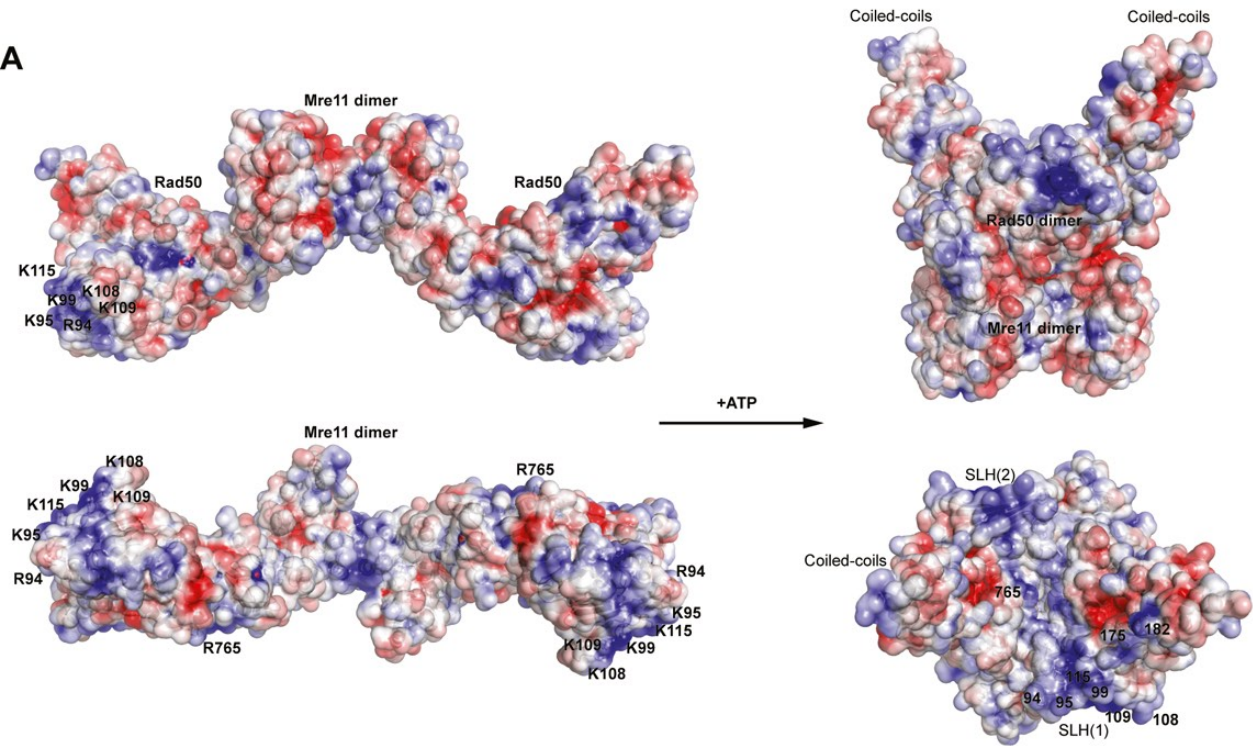

Supplement: embj0033-2847-sd7.pdf [file embj0033-2847-sd7.pdf]
